# Supplementary material for: Assessment of Healthy and Harmful Maillard Reaction Products in a Novel Coffee Cascara Beverage: Melanoidins and Acrylamide
Source: PubMed Central journal article supplement (PMC7278827; doi:10.3390/foods9050620), 2020-05-12
Supplement: foods-09-00620-s001.pdf [file foods-09-00620-s001.pdf]

1

(A)

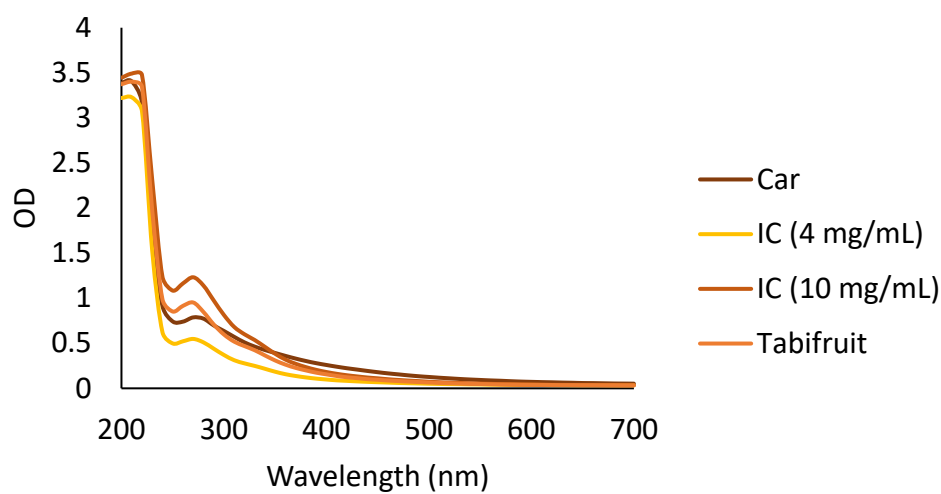

2

(B)

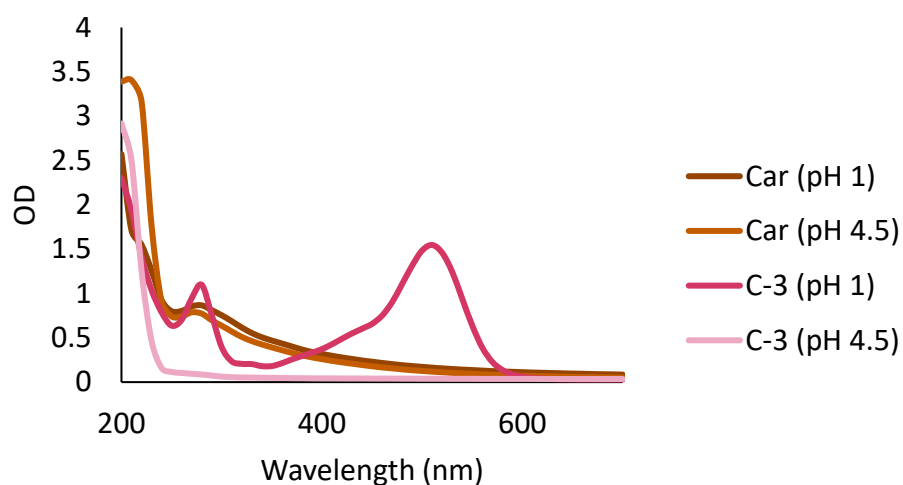

3

4

5

6

7

**Figure S1.** (A) UV-Visible absorption spectrum of the three beverages and caramel E-150d (Car) at 1 mg/mL, measured in a wavelength range of 200 to 700 nm. (B) UV-Visible spectrum of caramel E-150d (Car) at 1 mg/mL and cyanidine-3-glucoside (C-3) at 0.15 mg/mL at pH 1 and 4.5.

8

9 **Table S1.** Measurement of color (L, a\*, b\*) of the three beverages IC (4 mg/mL), IC (10 mg/mL) and  
 10 Tabifruit after stability test for 72 h. Studied conditions were: Fresh, 40 °C and light (Temp + light),  
 11 room temperature and light (light) and room temperature and no light exposure (darkness).

|                          |              | Color                     |                          |                           |
|--------------------------|--------------|---------------------------|--------------------------|---------------------------|
|                          |              | L                         | a*                       | b*                        |
| <b>IC<br/>(4 mg/mL)</b>  | Fresh        | 78.45 ± 0.2 <sup>b</sup>  | 17.94 ± 0.4 <sup>c</sup> | 56.50 ± 0.7 <sup>c</sup>  |
|                          | Temp + light | 88.47 ± 0.5 <sup>c</sup>  | 4.52 ± 0.2 <sup>a</sup>  | 20.72 ± 0.3 <sup>a</sup>  |
|                          | Light        | 79.89 ± 1.3 <sup>b</sup>  | 13.66 ± 1.2 <sup>b</sup> | 48.74 ± 0.4 <sup>b</sup>  |
|                          | Darkness     | 74.62 ± 0.8 <sup>a</sup>  | 24.27 ± 0.6 <sup>d</sup> | 73.76 ± 0.7 <sup>d</sup>  |
| <b>IC<br/>(10 mg/mL)</b> | Fresh        | 60.83 ± 0.8 <sup>a</sup>  | 32.53 ± 0.5 <sup>c</sup> | 59.99 ± 4.1 <sup>a</sup>  |
|                          | Temp + light | 69.59 ± 2.00 <sup>b</sup> | 20.78 ± 3.3 <sup>a</sup> | 67.40 ± 0.6 <sup>b</sup>  |
|                          | Light        | 57.55 ± 2.9 <sup>a</sup>  | 34.97 ± 1.7 <sup>c</sup> | 83.70 ± 2.7 <sup>d</sup>  |
|                          | Darkness     | 65.77 ± 2.4 <sup>b</sup>  | 26.62 ± 0.9 <sup>b</sup> | 73.93 ± 0.9 <sup>c</sup>  |
| <b>Tabifruit</b>         | Fresh        | 67.74 ± 2.2 <sup>a</sup>  | 27.49 ± 1.3 <sup>c</sup> | 57.75 ± 7.4 <sup>b</sup>  |
|                          | Temp + light | 80.71 ± 1.2 <sup>b</sup>  | 11.89 ± 0.6 <sup>a</sup> | 47.36 ± 0.9 <sup>a</sup>  |
|                          | Light        | 78.84 ± 1.4 <sup>b</sup>  | 14.72 ± 0.5 <sup>b</sup> | 53.63 ± 1.2 <sup>ab</sup> |
|                          | Darkness     | 76.21 ± 2.2 <sup>b</sup>  | 15.60 ± 0.9 <sup>b</sup> | 57.61 ± 1.3 <sup>b</sup>  |

12 Values indicate the mean ± standard deviation. Different letters represent significant differences for each sample  
 13 and parameter (Tukey Test.  $p < 0.05$ ).

14
